# Supplementary material for: A Novel Method for the Quantification of White Wine Mannoproteins by a Competitive Indirect Enzyme-Linked Lectin Sorbent Assay (CI-ELLSA)
Source: PubMed Central journal article supplement (PMC6321203; doi:10.3390/molecules23123070), 2018-11-23
Supplement: molecules-23-03070-s001.pdf [file molecules-23-03070-s001.pdf]

**Appendix A**
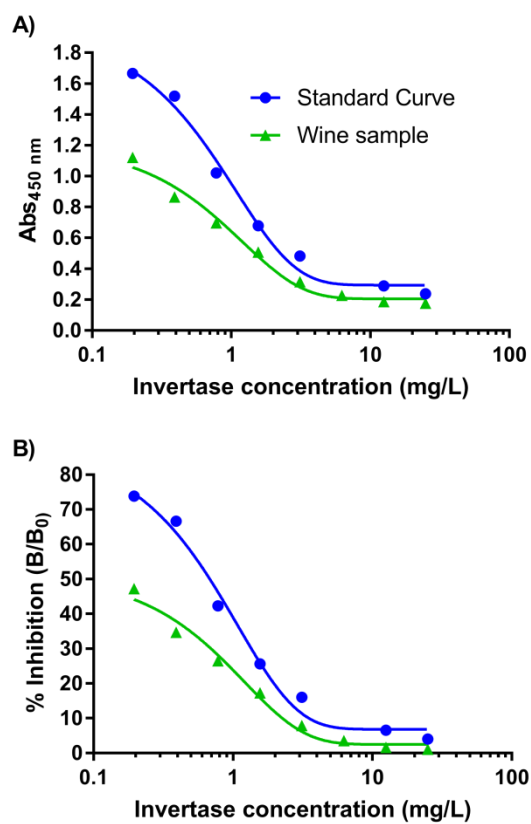

**Figure S1:** Calibration curve prepared with serial dilutions of yeast invertase (Standard curve, in blue) and curve prepared from a serial dilution for the determination of MPs content in a sparkling wine sample (in green). Data are expressed as Absorbance measured at 450 nm (A) and as % of inhibition expressed as  $B/B_0$  (B).
